# Supplementary material for: DNA-bridging by an archaeal histone variant via a unique tetramerisation interface
Source: Springer Nature journal article supplement (doi:10.1038/s42003-023-05348-2), 2023-09-22
Supplement: MOESM2 [file 42003_2023_5348_MOESM2_ESM.pdf]

# Supplementary Information

## DNA-bridging by an archaeal histone variant via a unique tetramerisation interface

Sapir Ofer, Fabian Blombach, Amanda M. Erkelens, Declan Barker, Zoja Soloviev, Samuel Schwab, Katherine Smollett, Dorota Matelska, Thomas Fouqueau, Nico van der Vis, Nicholas A. Kent, Konstantinos Thalassinou, Remus T. Dame, and Finn Werner

## Supplementary Table 1

### List of oligonucleotides used in this study

| Oligo ID                                                                                                           | Oligo name                       | SEQUENCE                                                        | Purpose (resulting plasmid)                                                                   |
|--------------------------------------------------------------------------------------------------------------------|----------------------------------|-----------------------------------------------------------------|-----------------------------------------------------------------------------------------------|
| <b>Heterologous expression of MJ1647, A3 and variants</b>                                                          |                                  |                                                                 |                                                                                               |
| FW697                                                                                                              | MJ1647<br>NdeI fw                | GGAATTCATATGTTACCAAAAGCTACAGTAA                                 | cloning of gene for MJ1647 into pET21a(+)<br>(p1540)                                          |
| FW2341                                                                                                             | MJ1647<br>XhoI rv                | GCGCGCTCGAGCTATAATTAGATGTTATTACATTCAACA                         | cloning of gene for MJ1647 into pET21a(+)<br>(p1540)                                          |
| FW1078                                                                                                             | MJ1647<br>dTM XhoI rv            | GGGCTCGAGTCATCTCTTTAATCTTTTCATCATCACACTG                        | cloning of gene for MJ1647ΔTM into<br>pET21a(+)<br>(p1542)                                    |
| FW693                                                                                                              | MJ1258<br>NdeI fw                | GGAATTCATATGGCTGAGCTTCCAGTTGC                                   | cloning of gene for MJ1258 (A3) into<br>pET21a(+)<br>(p1539)                                  |
| FW2222                                                                                                             | MJ1258<br>XhoI rv                | GCCGCTCGAGTTAACCTCTCAATGCTGCCTTT                                | cloning of gene for MJ1258 (A3) into<br>pET21a(+)<br>(p1539)                                  |
| FW2171                                                                                                             | MJ1647<br>K80E fw                | AAATGCCAATATTAATTAAGAGATGTTGA                                   | Site-directed mutagenesis of p1540 to<br>produce MJ1647 K80E                                  |
| FW2172                                                                                                             | MJ1647<br>K80E rv                | CATCAGTTCTTTCACTAAGTTCCA                                        | Site-directed mutagenesis of p1540 to<br>produce MJ1647 K80E                                  |
| FW2178                                                                                                             | MJ1647<br>E95K fw                | AATTATAGCTGACTCGAGC                                             | Site-directed mutagenesis of p1540 to<br>produce MJ1647 E95C (p1650)                          |
| FW2179                                                                                                             | MJ1647<br>E95K rv                | TAGATGTTATTACATTCAACA                                           | Site-directed mutagenesis of p1540 to<br>produce MJ1647 E95C (p1650)                          |
| FW2327                                                                                                             | MJ1647<br>C28S/C62S<br>vector fw | AGATATTAACAGCTCTGATGATGAAAGATTAAGAGAAAGA                        | NEBuilder Hifi assembly on p1540 to<br>produce MJ1647 C28S/C62S (p1737)                       |
| FW2328                                                                                                             | MJ1647<br>C28S/C62S<br>vector rv | CTTCAAGCATATTAGAGAGTTCATCAACCGCCTCT                             | NEBuilder Hifi assembly on p1540 to<br>produce MJ1647 C28S/C62S (p1737)                       |
| FW2329                                                                                                             | MJ1647<br>C28S/C62S<br>insert fw | GGTTGATGAACTCTCTAATATGCTTGAAGAAATTATAAAG                        | NEBuilder Hifi assembly on p1540 to<br>produce MJ1647 C28S/C62S (p1737)                       |
| FW2330                                                                                                             | MJ1647<br>C28S/C62S<br>insert rv | ATCTTTTCATCATCAGACTGTTAATATCTCTTGCTT                            | NEBuilder Hifi assembly on p1540 to<br>produce MJ1647 C28S/C62S (p1737)                       |
| FW2331                                                                                                             | MJ1647<br>K80C/E95C<br>fw        | TGTTGAATGTAATAACATCTTGTTTATAGCTGACTCGAGCACCA                    | Site-directed mutagenesis of p1737 to<br>produce MJ1647 C28S/C62S/K80C/E95C<br>(p1740)        |
| FW2332                                                                                                             | MJ1647<br>K80C/E95C<br>rv        | TCTCTTAATTAATATTGGCATAAATCAGTTCTTTCACTAAGTTCCA                  | Site-directed mutagenesis of p1737 to<br>produce MJ1647 C28S/C62S/K80C/E95C<br>(p1740)        |
| FW2333                                                                                                             | MJ1647 E95<br>fw                 | TGTTGAATGTAATAACATCTGAATTATAGCTGACTCGAGCACCA                    | Site-directed mutagenesis with FW2332 of<br>p1737 to produce MJ1647 C28S/C62S/K80C<br>(p1739) |
| FW2334                                                                                                             | MJ1647 K80<br>rv                 | TCTCTTAATTAATATTGGCATCTTATCAGTTCTTTCACTAAGTTCCA                 | Site-directed mutagenesis of p1737 with<br>FW2331 to produce MJ1647<br>C28S/C62S/E95C (p1742) |
| FW2240                                                                                                             | MJ1647<br>XhoI rv2               | GCGCGCTCGAGTCATAATTAGATGTTATTACATTCAACA                         | cloning of gene for MJ1647 with FW697<br>into pETDuet-1 (p1689)                               |
| FW2192                                                                                                             | MJ1258<br>NcoIFor                | GCGCGCCATGGCTGAGCTTCCAGTTGC                                     | cloning of gene for MJ1258 (A3) into<br>pETDuet-1 (p1689)                                     |
| FW2243                                                                                                             | MJ A3 stp<br>BamHI rv            | GCCGGGATCCTTAACCTCTCAATGCTGCCTTT                                | cloning of gene for MJ1258 (A3) into<br>pETDuet-1 (p1689)                                     |
| <b>Amplification and cloning of templates for EMSA, in vitro transcription and chromatin reconstitution assays</b> |                                  |                                                                 |                                                                                               |
| FW1137                                                                                                             | rpo5<br>operon fw                | CATATGACTGTAAAAGTATGGAGTTGATTTAATATTTT                          | Cloning of rpo5 operon into pGEM for<br>agarose EMSAs (p1664)                                 |
| FW1138                                                                                                             | rpo5<br>operon rv                | CTCGAGTCTTTAGCCACAACCTCTGGA                                     | Cloning of rpo5 operon into pGEM for<br>agarose EMSAs (p1664)                                 |
| FW1522                                                                                                             | T6 rpo5<br>NcoI fw               | GCGGCCATGGAAGAATTACAATGGCTGCAG                                  | Cloning of 500 bp part of rpo5 operon into<br>pGEM containing T6 promoter (p1471)             |
| FW1523                                                                                                             | T6 rpo5<br>BamHI rv              | GCGGGGATCCGTTAACTTGAATTGTTATC                                   | Cloning of 500 bp part of rpo5 operon into<br>pGEM containing T6 promoter (p1471)             |
|                                                                                                                    | 30 bp fw                         | CATACTGGTTCCAAAGCATGAAATAGTTCCAA                                | EMSAs                                                                                         |
|                                                                                                                    | 30 bp rv                         | TTGGAATATTTTCATGCTTTGGAACCATGATG                                | EMSAs                                                                                         |
|                                                                                                                    | 60 bp fw                         | CATACTGGTTCCAAAGCATGAAATAGTTCCAAAGAAGAAGTTGAGGAG<br>TTTTGAAGAGA | EMSAs                                                                                         |
|                                                                                                                    | 60 bp rv                         | TCTCTTCAAACTCCTCAACTTCTTTTGGAACTATTTTCATGCTTTG<br>GAACCATGATG   | EMSAs                                                                                         |

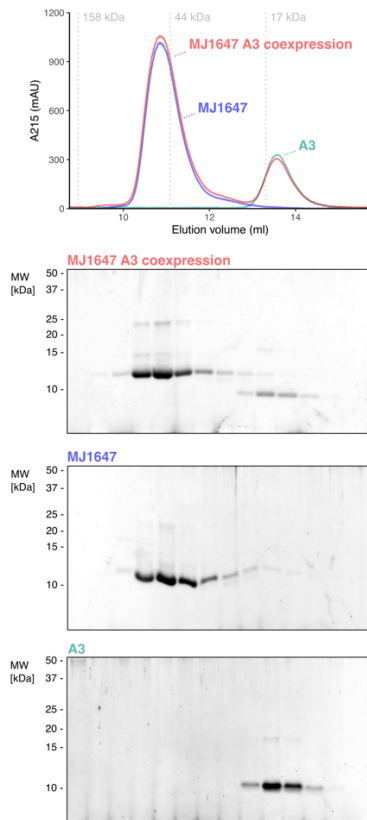

### Supplementary Figure 1

SEC of recombinantly co-expressed MJ1647 and A3 versus the single proteins alone. Absorption profiles (top) and SYPRO-Orange-stained SDS-PAGE gels of the fractions (bottom) show distinct elution profiles for MJ1647 and A3 with no evidence of significant levels of cross-dimerisation between the proteins.

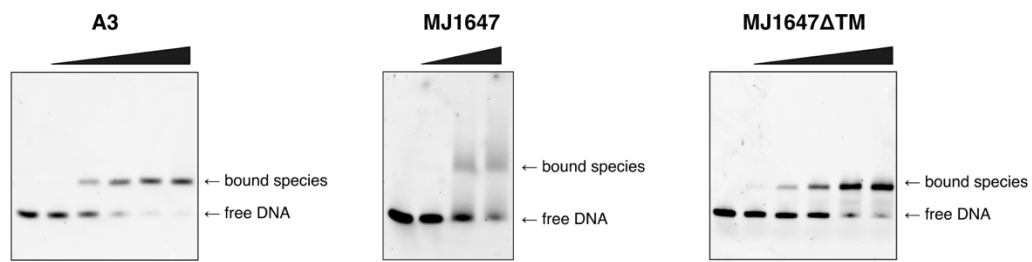

### Supplementary Figure 2

EMSA experiments testing binding to 30 bp DNA templates. Increasing concentrations of histones A3, MJ1647 and the deletion variant MJ1647ΔTM were incubated with the respective <sup>32</sup>P-labelled DNA templates and resolved on native polyacrylamide gels. Protein concentrations were 2, 4, 6, 12, 14 μM histone monomers for A3 and MJ1647ΔTM, 4, 8, 12 μM for MJ1647.

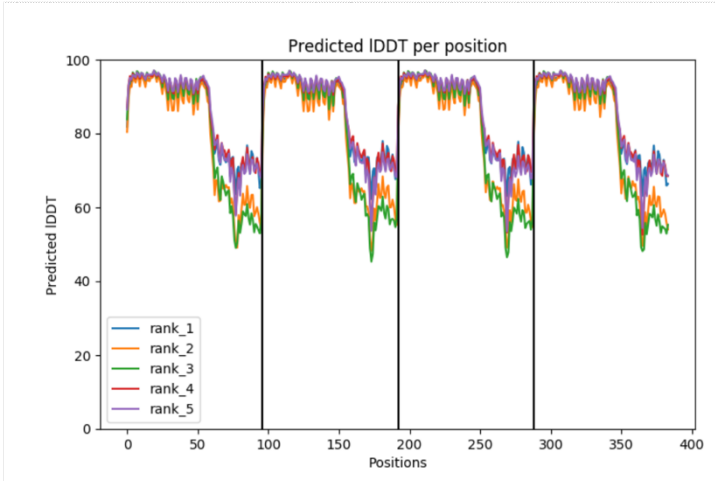

### Supplementary Figure 3

Predicted local Distance Difference Test (pIDDT) for the five MJ1647 tetramer models produced by AlphaFold2.

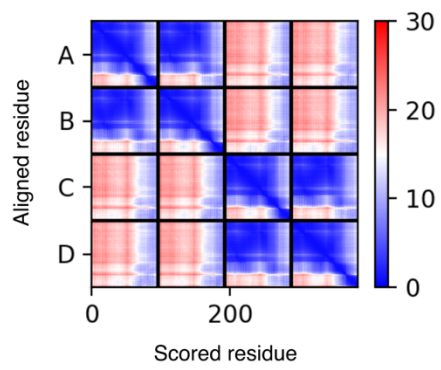

#### Supplementary Figure 4

Predicted alignment error (PAE) for the rank 1 MJ1647 tetramer model produced by AlphaFold2. A to D denote the four amino acid chains.

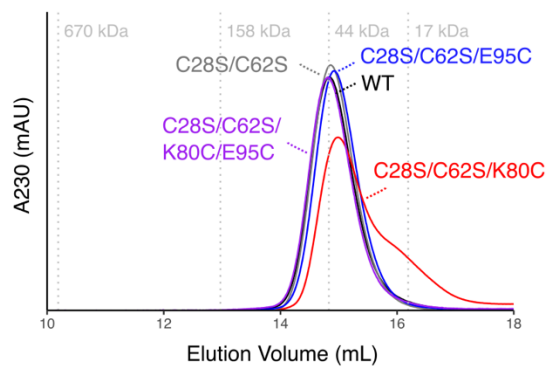

### Supplementary Figure 5

Size exclusion chromatography elution profiles of MJ1647 cysteine mutants K80C, E95C, K80C/E95C in the MJ1647 C28S/C62S background compared to WT MJ1647.

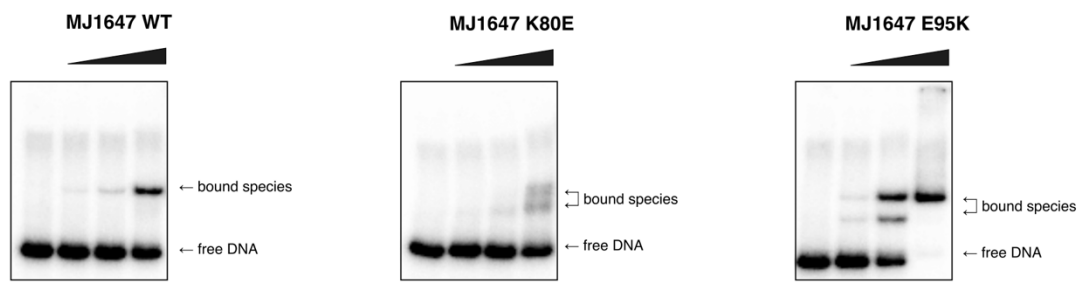

### Supplementary Figure 6

MJ1647 K80E and E95K bind to 60 bp DNA as dimer at lower protein concentrations. EMSA experiments testing binding of 0.04 to 0.16  $\mu$ M MJ1647 WT, K80E, and E95K monomers to 60bp  $^{32}$ P-labelled DNA.



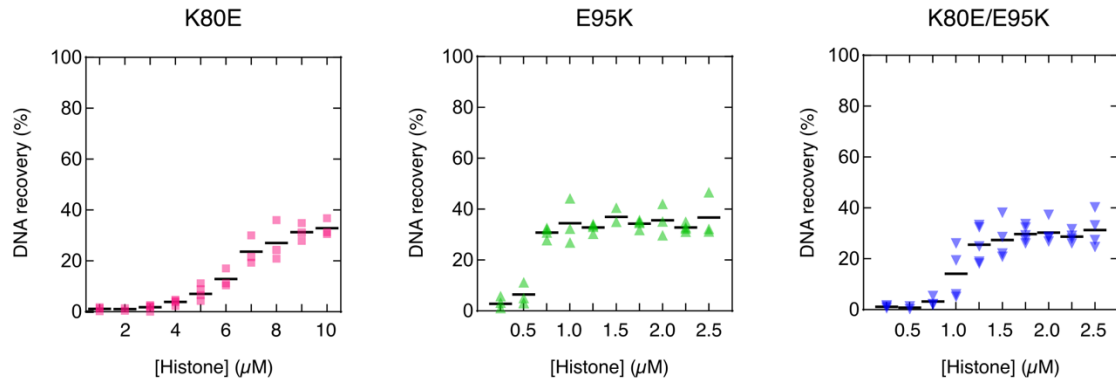

### Supplementary Figure 7

MJ1647 K80E and E95K mutants retain DNA bridging activity. DNA bridging assays with salt bridge mutants of MJ1647 K80E and E95K and the double mutant K80E/E95K compared to wild-type MJ1647. DNA recovery (%) is plotted as a function of histone monomer concentration. Black bars show mean values of at least three independent measurements for each protein with colored symbols showing the individual replicates.

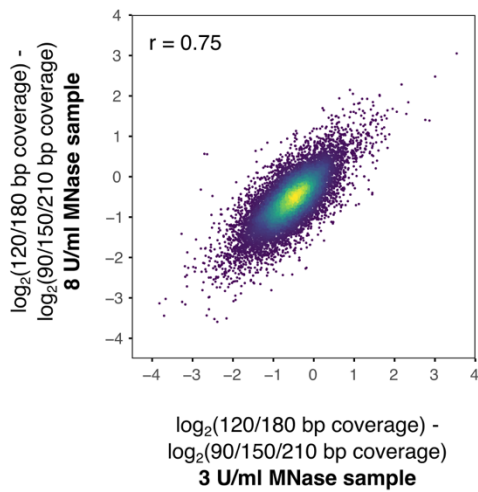

### Supplementary Figure 8

MNase-seq data for *M. jannaschii* show coverage of both odd and even 30mer multiples for all genomic regions. The  $\log_2$ -ratio of even 30mer multiple coverage (120 and  $180 \pm 5$  bp DNA fragments) over odd 30mer multiple coverage (90, 150 and  $210 \pm 5$  bp) was calculated for the 3u and 8u MNase-seq samples over consecutive 120 bp bins ( $n = 14810$ ) covering the main chromosome and extrachromosomal elements. Bins with 0 coverage values were removed.

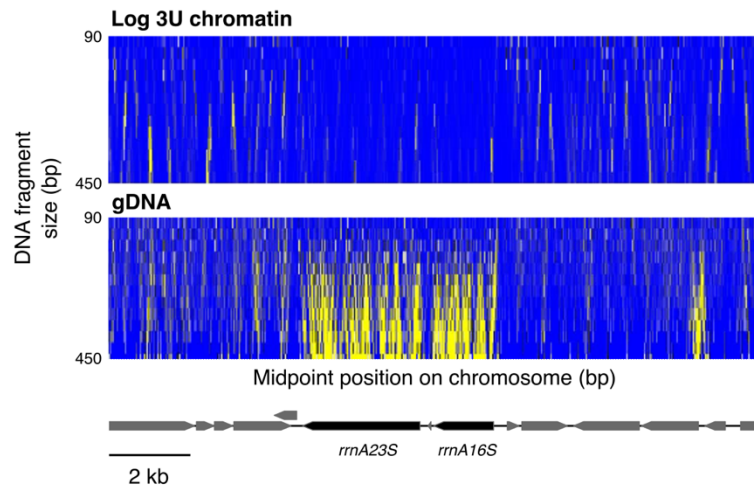

### Supplementary Figure 9

rRNA loci are underchromatinised in *M. jannaschii*. MNase (3 units/ml) resistant mid-point frequency values from log-phase cells ranging in size from 90-450 bp in 30 bp intervals are plotted as a heatmap relative to a 16 kb region of the chromosome with positive frequency values coloured yellow. The rRNA operon genes are highlighted in black. The genomic DNA control MNase-seq data (gDNA) show increased signal across the rRNA operon likely due to the higher GC-content that counters the cutting preference of MNase.

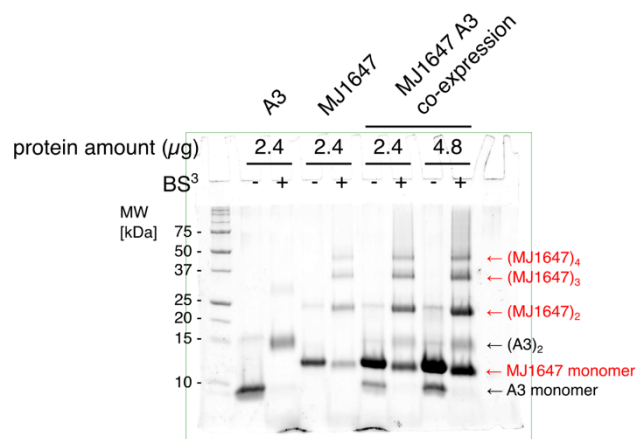

### Supplementary Figure 10

Unedited/uncropped gel for Figure 1h

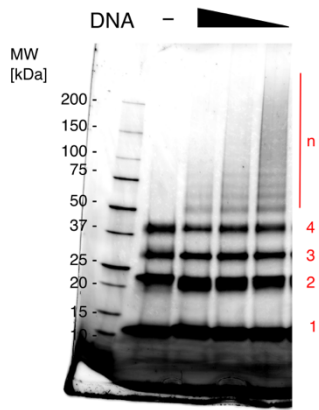

### Supplementary Figure 11

Unedited/uncropped gel for Figure 1i

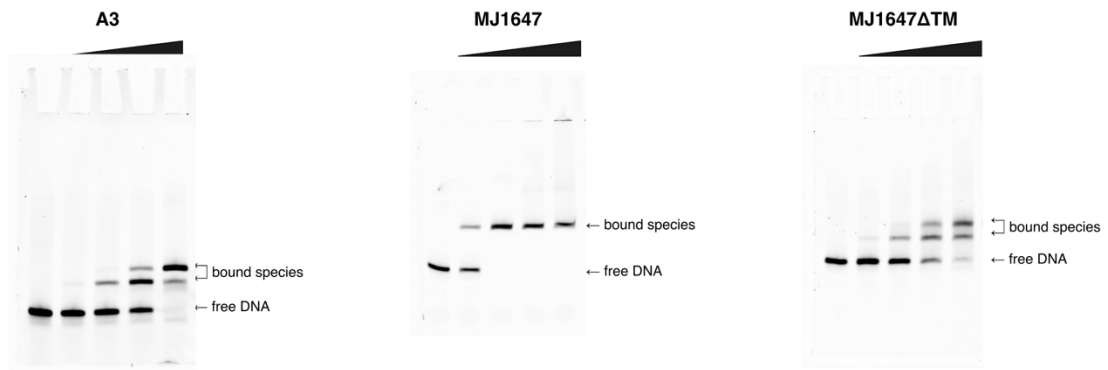

### Supplementary Figure 12

Unedited/uncropped gels for Figure 2abc

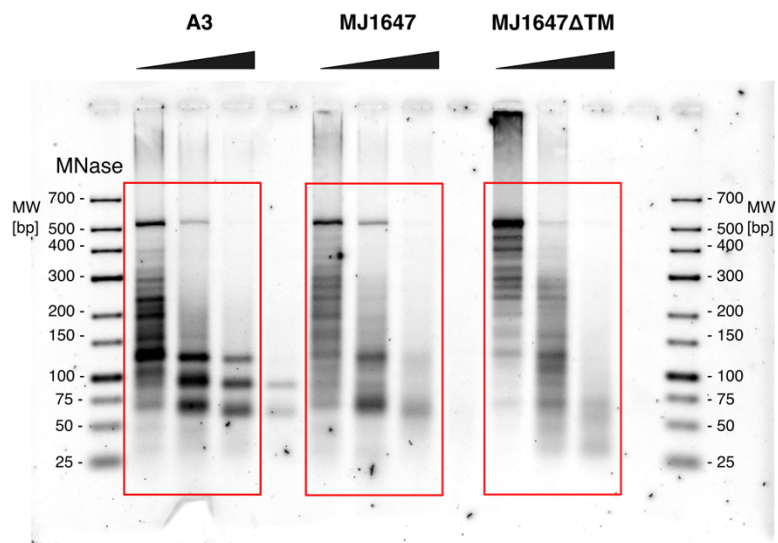

### Supplementary Figure 13

Unedited/uncropped gels for Figure 2def

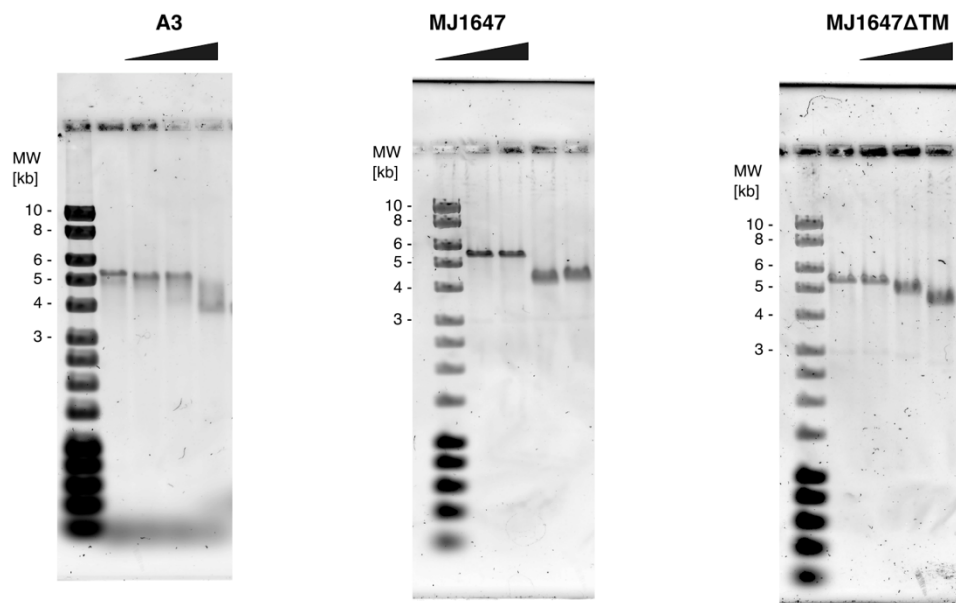

Supplementary Figure 14

Unedited/uncropped gels for Figure 2ghi



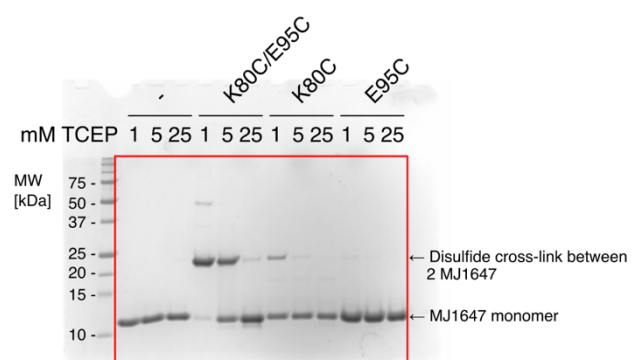

### Supplementary Figure 15

Unedited/uncropped gel for Figure 4e

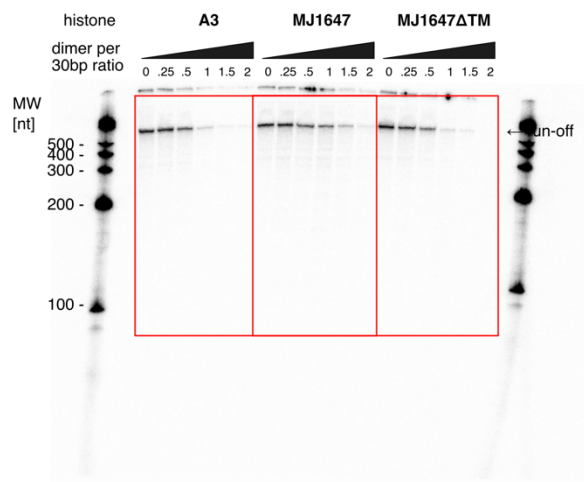

### Supplementary Figure 16

Unedited/uncropped gel for Figure 6a

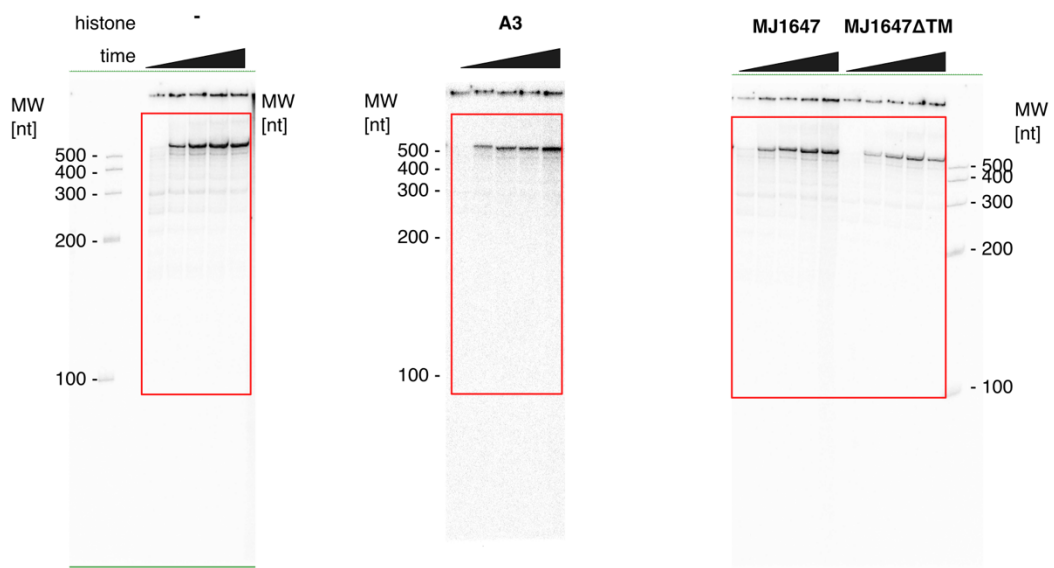

Supplementary Figure 17  
Unedited/uncropped gel for Figure 6b

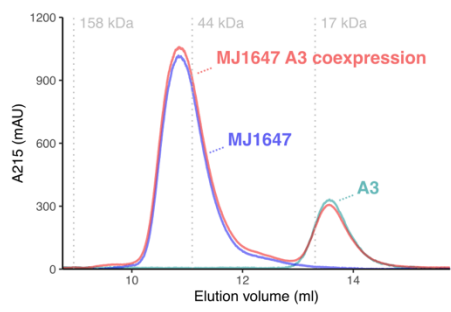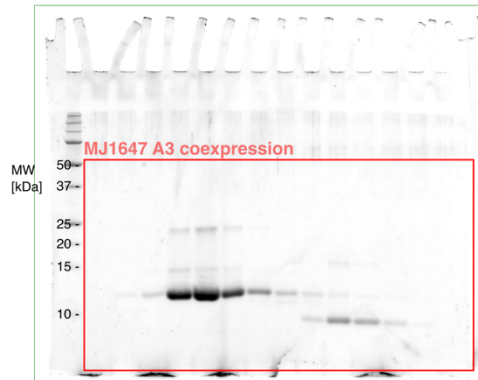

MJ1647

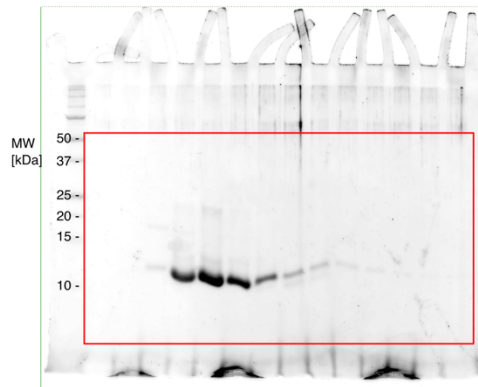

A3

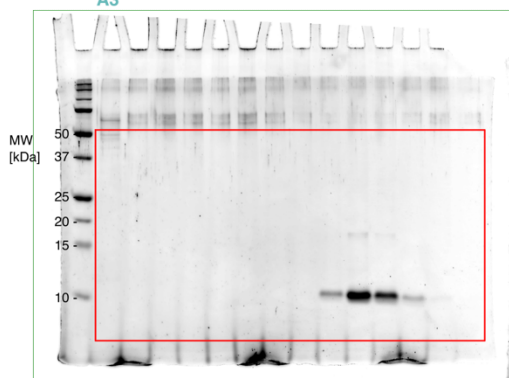

### Supplementary Figure 18

Unedited/uncropped gel for Supplementary Figure 1

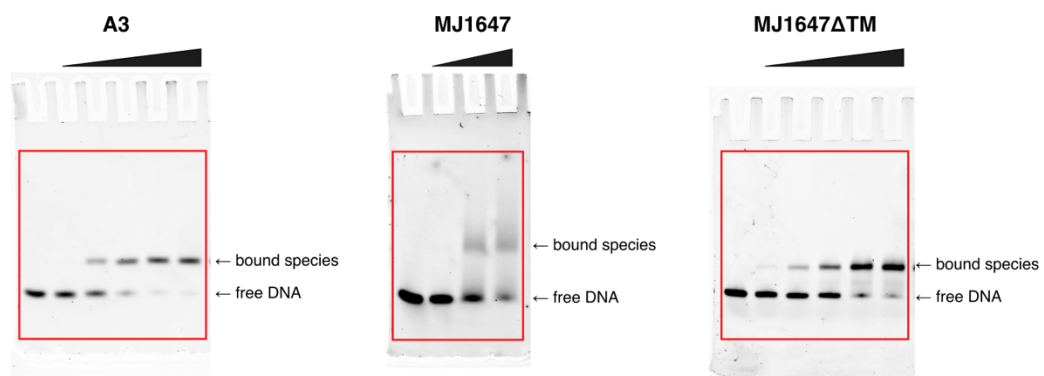

Supplementary Figure 19

Unedited/uncropped gel for Supplementary Figure 2

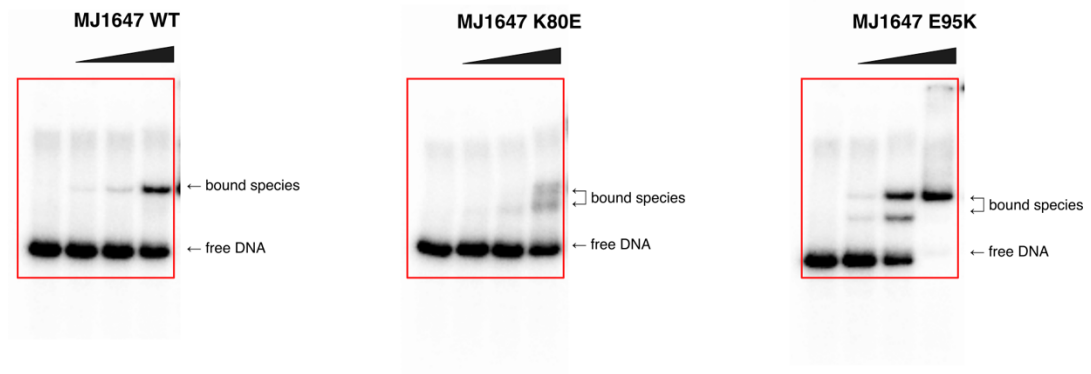

Supplementary Figure 20  
Unedited/uncropped gel for Supplementary Figure 6
