# Supplementary material for: DNA-bridging by an archaeal histone variant via a unique tetramerisation interface
Source: Springer Nature journal article supplement (doi:10.1038/s42003-023-05348-2), 2023-09-22
Supplement: MOESM3 [file 42003_2023_5348_MOESM3_ESM.pdf]

## **Description of Additional Supplementary Files**

**File name:** Supplementary Data 1

**Description:** The source data behind the graph in Figure 6a, multi-round transcription assays.

**File name:** Supplementary Data 2

**Description:** The source data behind the graph in Figure 6b, synchronized single-round transcription assays.
